# Supplementary material for: Army System for Mobilization Requirements Planning: Supply Classes V and VII (Ammunition and Equipment)
Source: Royal Society of Chemistry journal article supplement (doi:10.1039/d2cc00926a), 1989-10-01

## **Total Syntheses of Strained Polycyclic Terpenes**

Gleb A. Chesnokov and Karl Gademann\*

Department of Chemistry, University of Zurich, Winterthurerstrasse 190,

CH-8057 Zurich, Switzerland

### **Supporting Information**

# Total Synthesis of Shagene B

C. Tsukano, R. Yagita, T. Heike, T. A. Mohammed, K. Nishibayashi, K. Irie and Y. Takemoto, *Angew. Chem., Int. Ed.*, 2021, **60**, 23106-23111

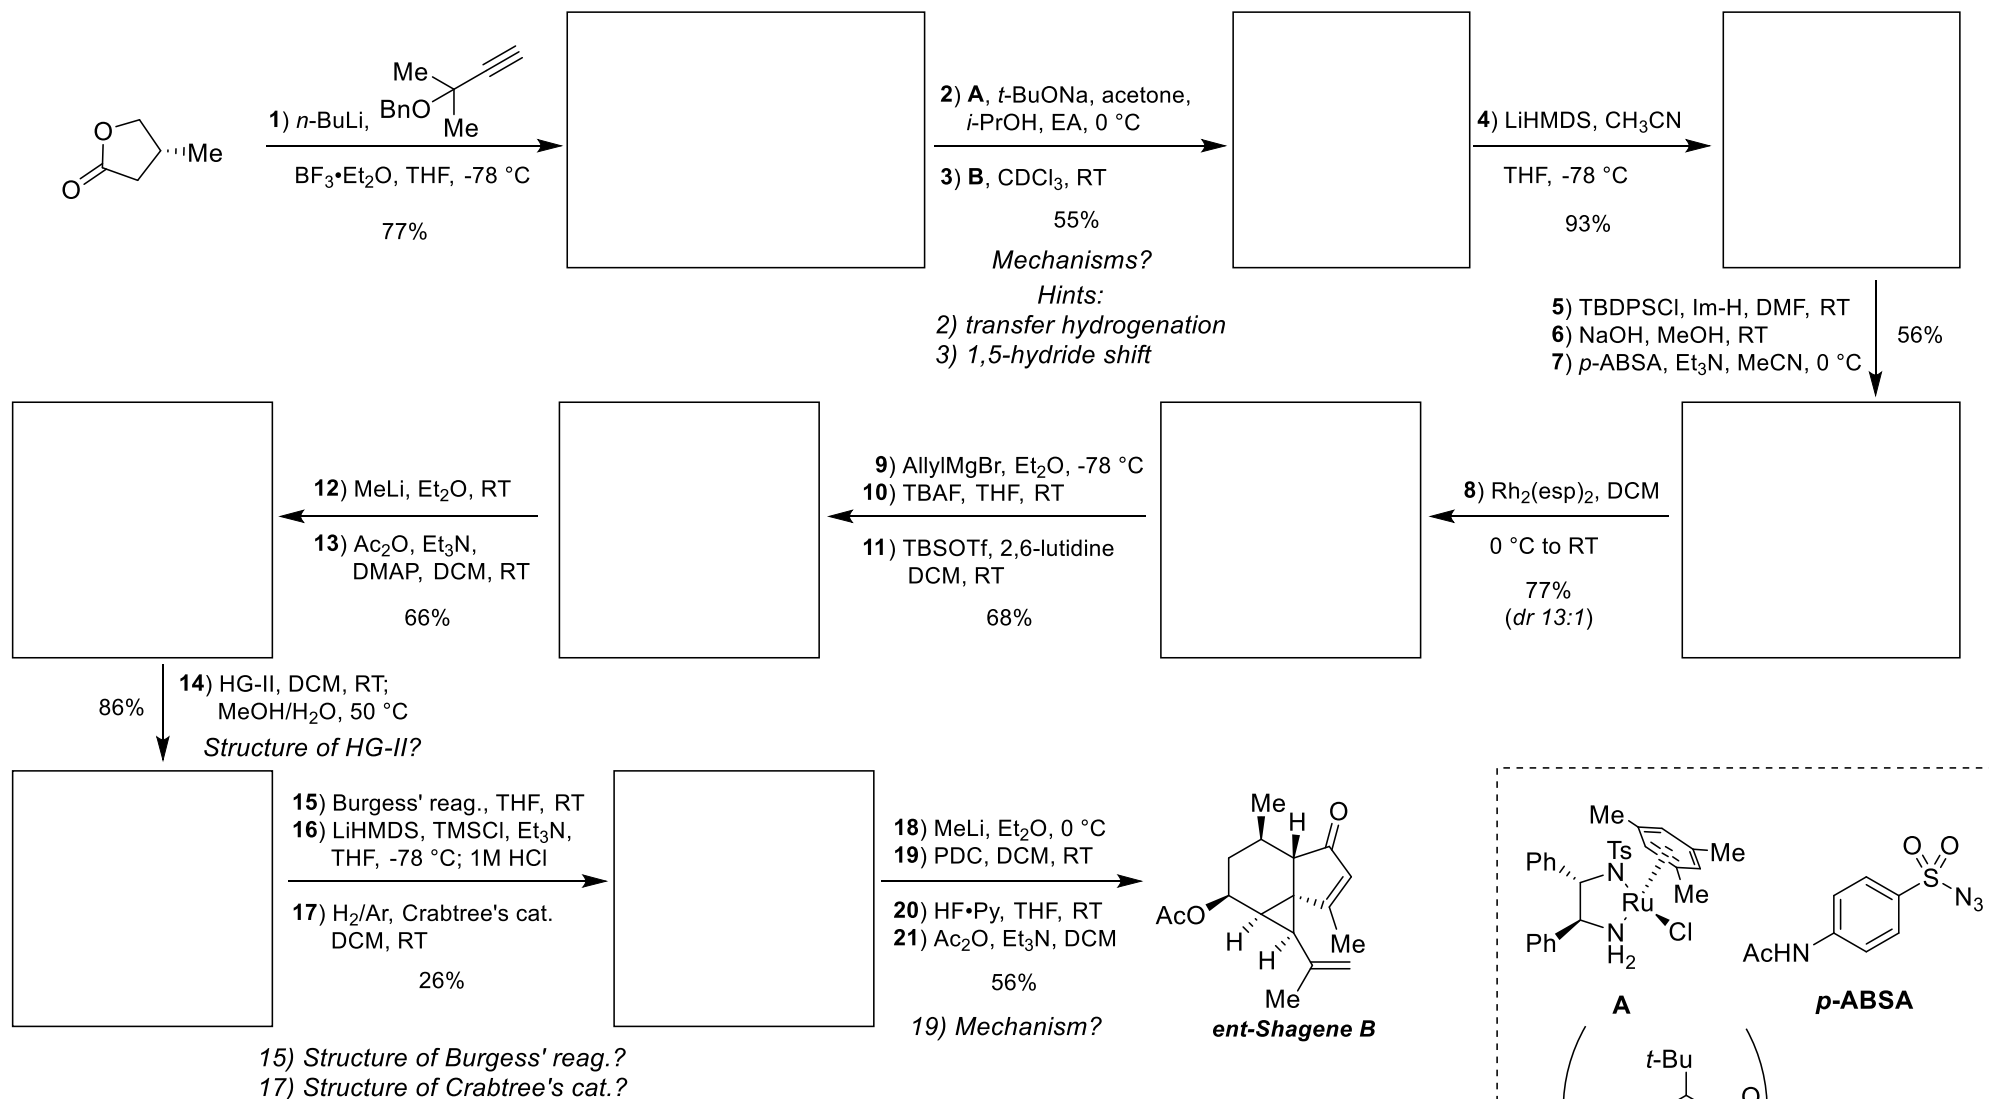

# Total Synthesis of Peyssonosol

G. A. Chesnokov and K. Gademann, *J. Am. Chem. Soc.*, 2021, **143**, 14083-14088

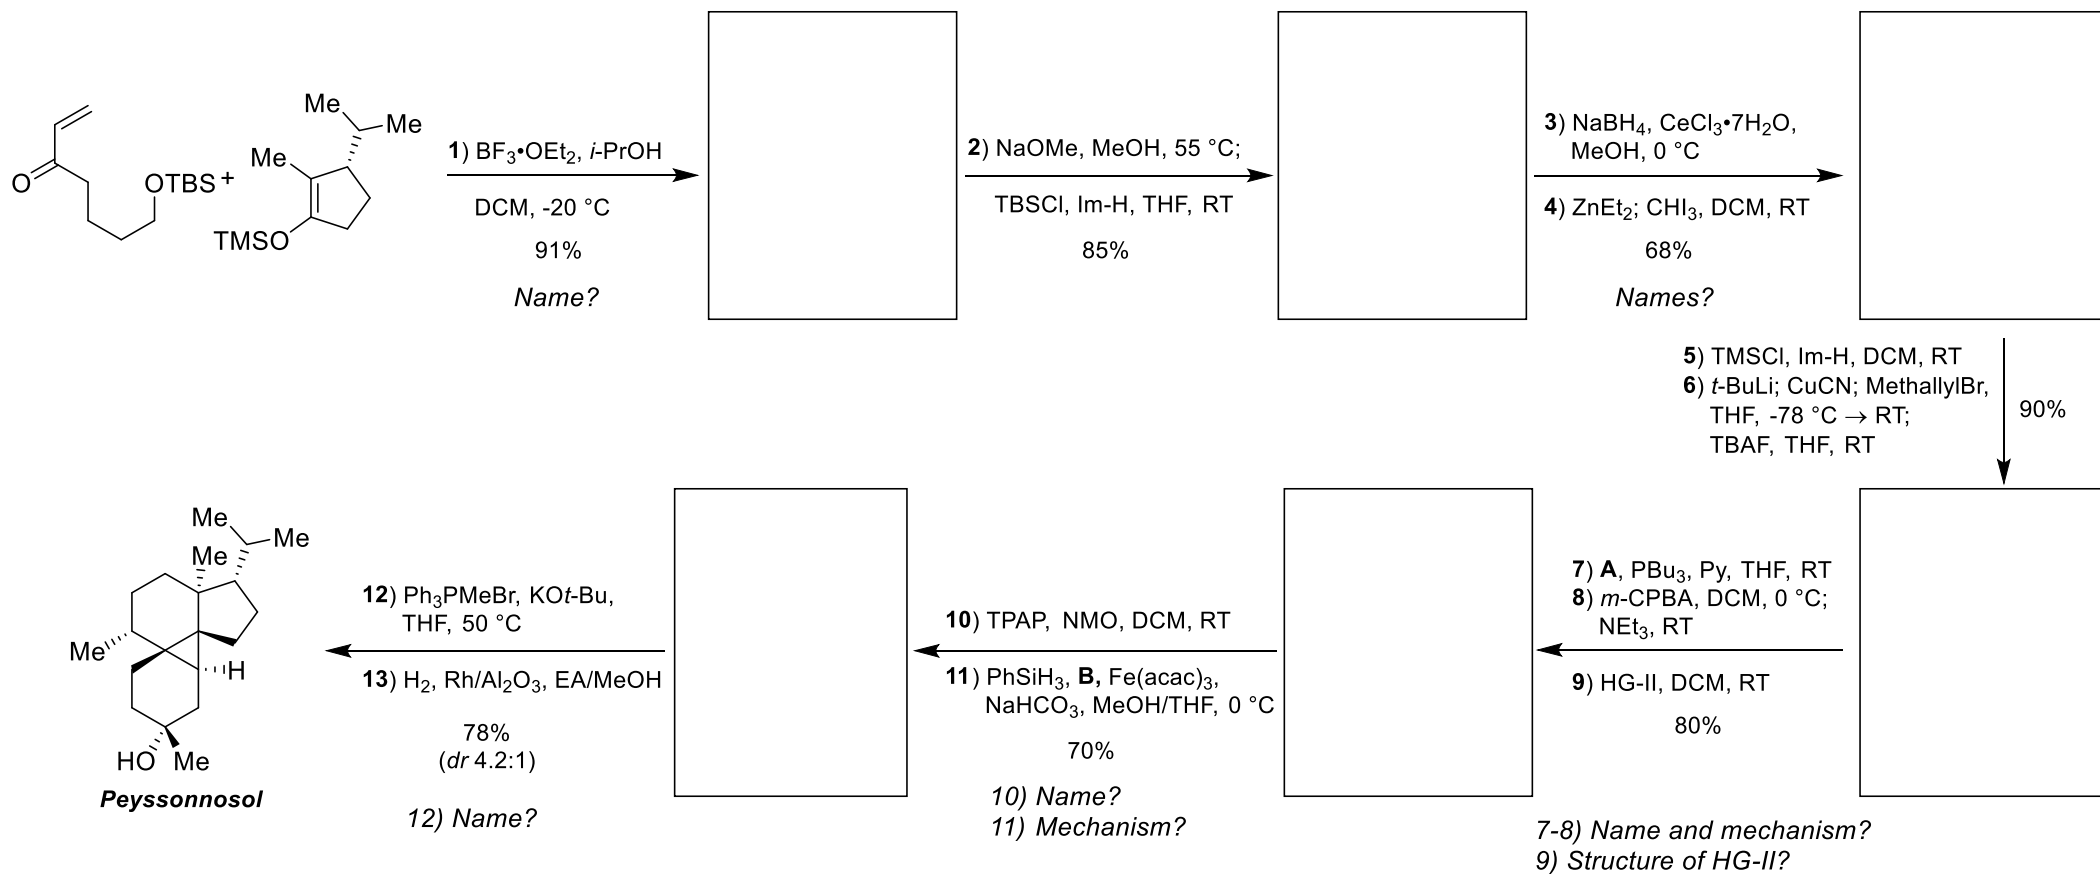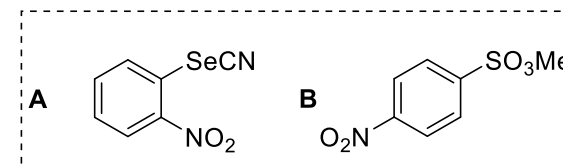

# Total Synthesis of (-)-Mitrephorone A

M. J. R. Richter, M. Schneider, M. Brandstätter, S. Krautwald and E. M. Carreira, *J. Am. Chem. Soc.*, 2018, **140**, 16704-16710

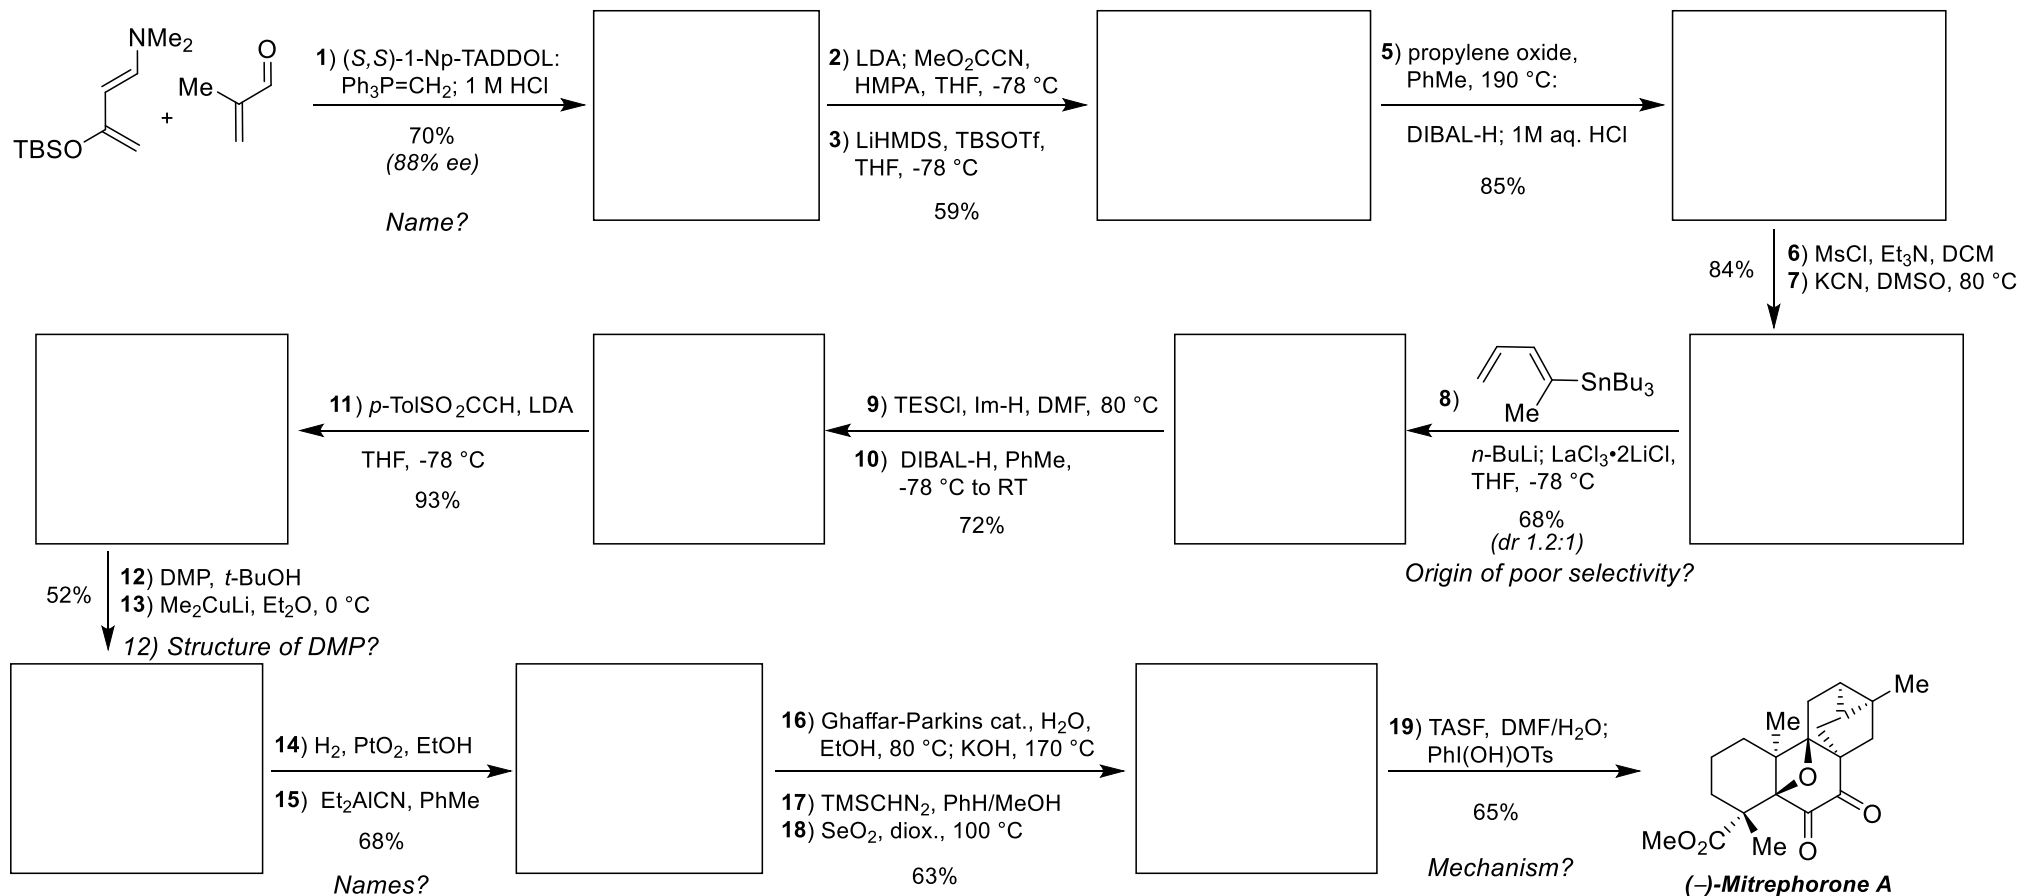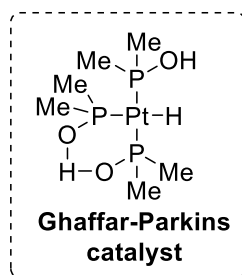

# Total Synthesis of (+)-Cyclobutastellettide B

Z. Zhang, S. Chen, F. Tang, K. Guo, X.-T. Liang, J. Huang and Z. Yang, *J. Am. Chem. Soc.*, 2021, **143**, 18287-18293

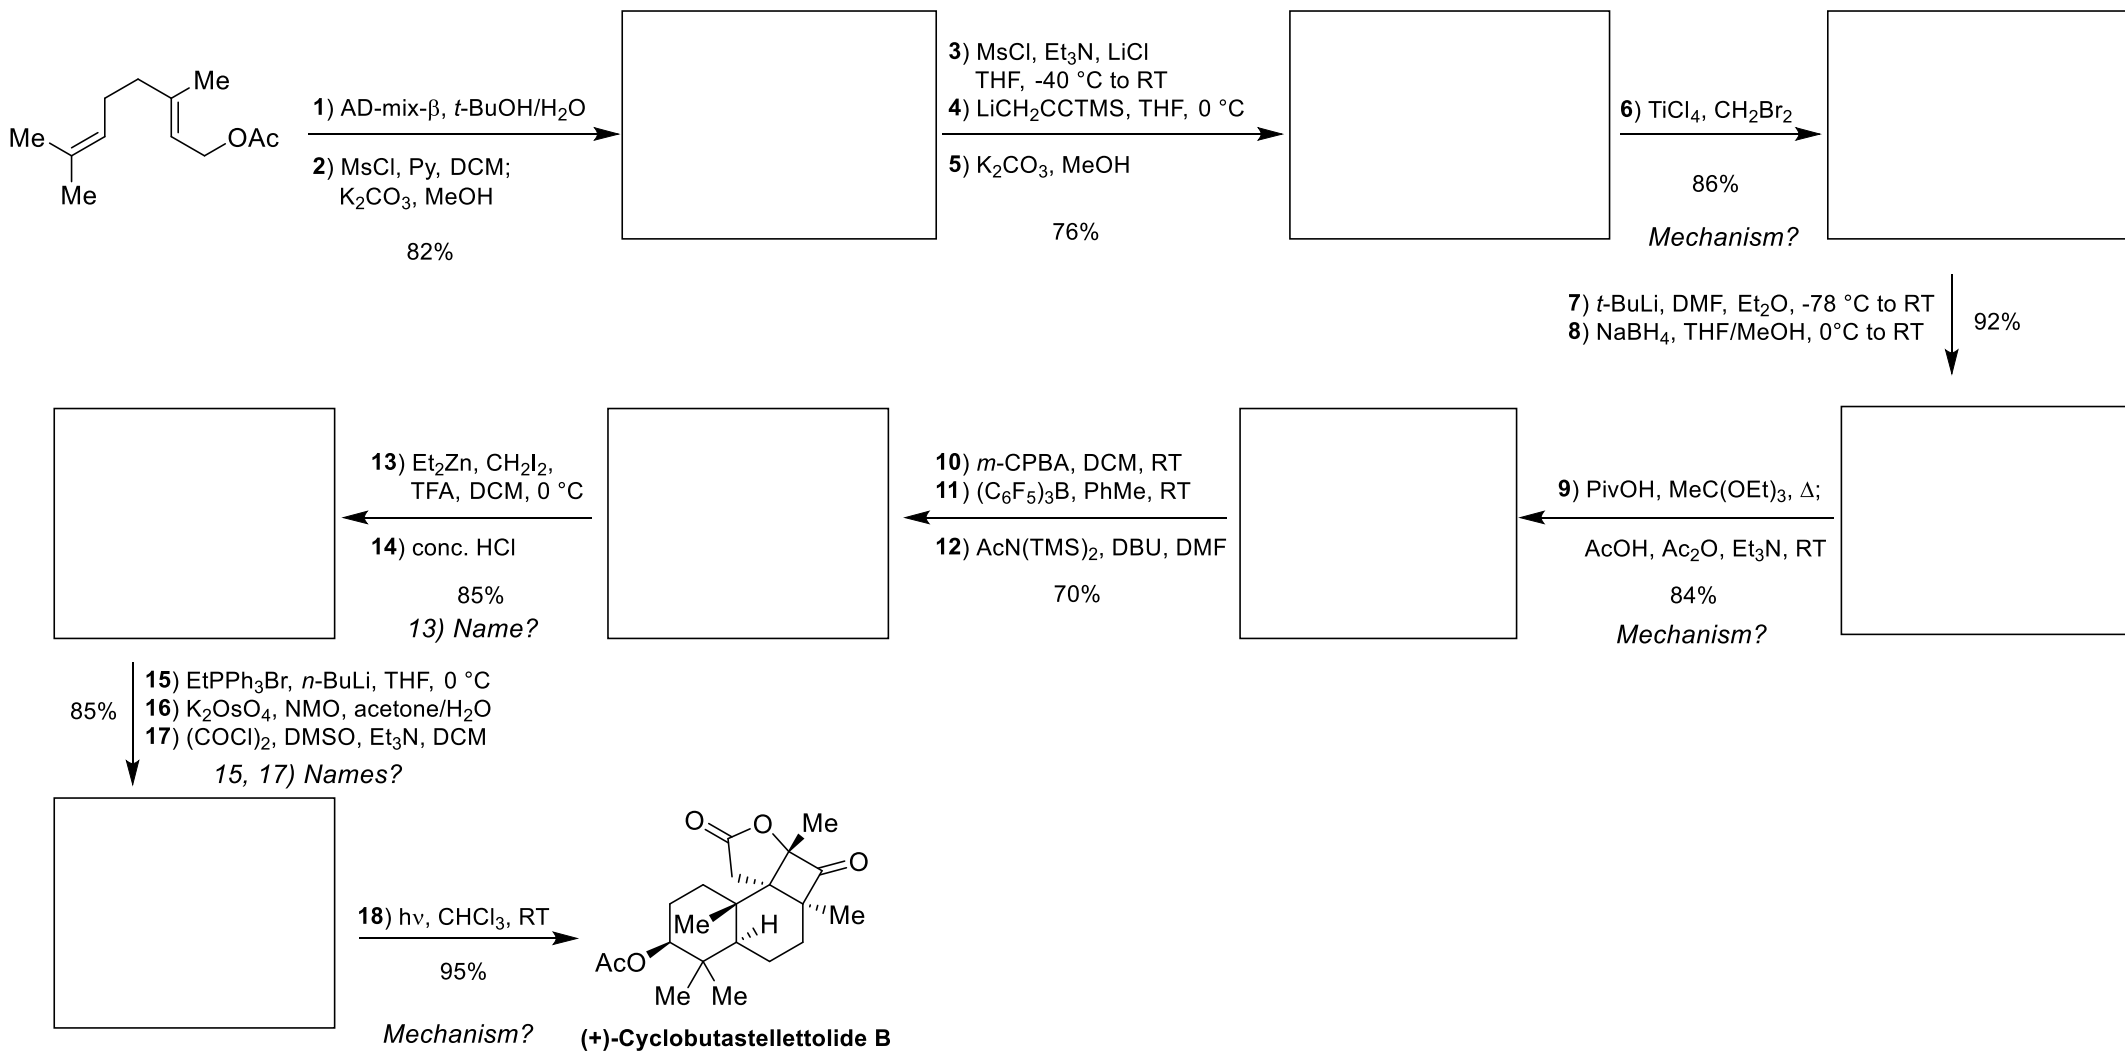

# Total Synthesis of Canataxpropellane

F. Schneider, K. Samarin, S. Zanella and T. Gaich, *Science*, 2020, **367**, 676-681.

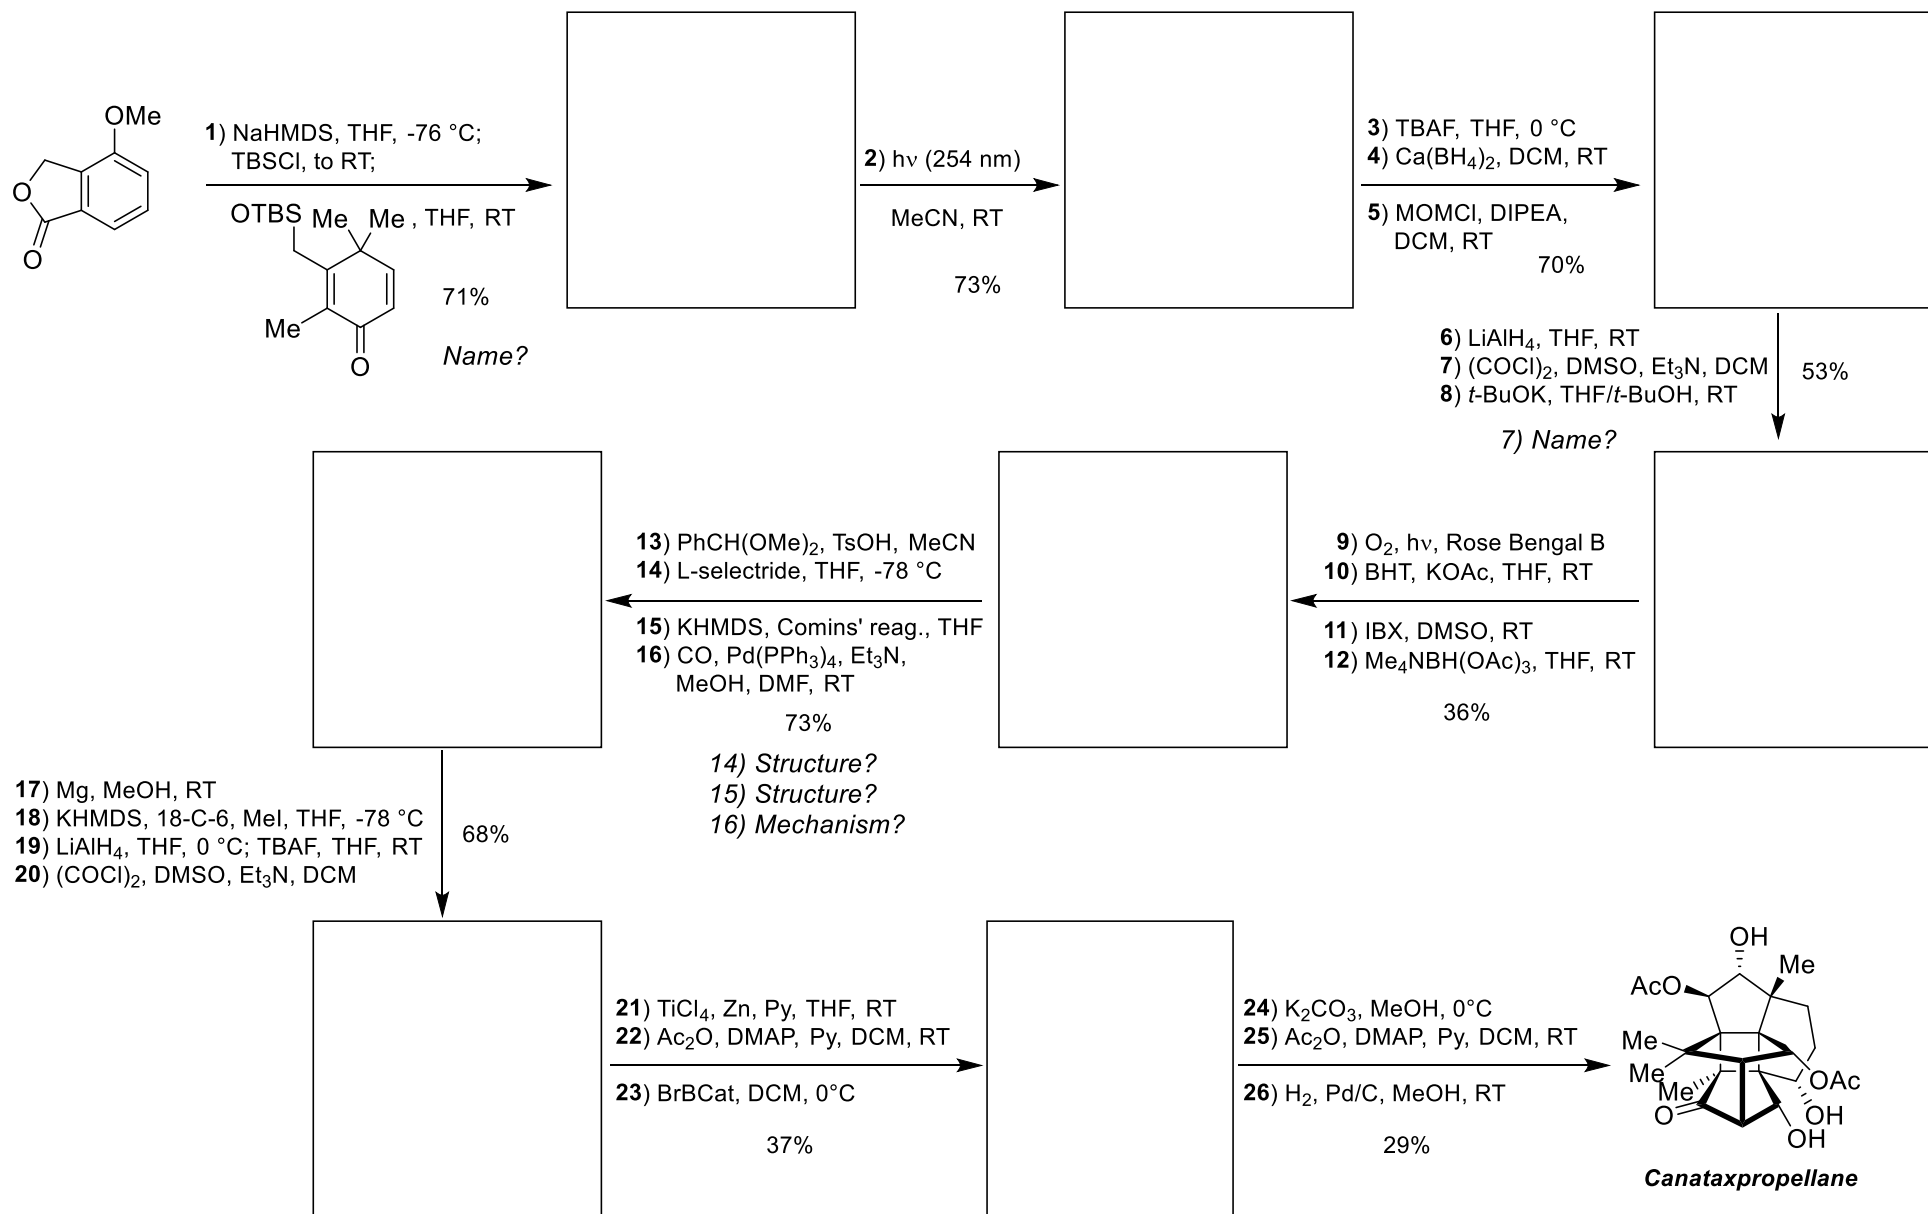

# Total Synthesis of Harziane

M. Hönig and E. M. Carreira, *Angew. Chem., Int. Ed.*, 2020, **59**, 1192-1196

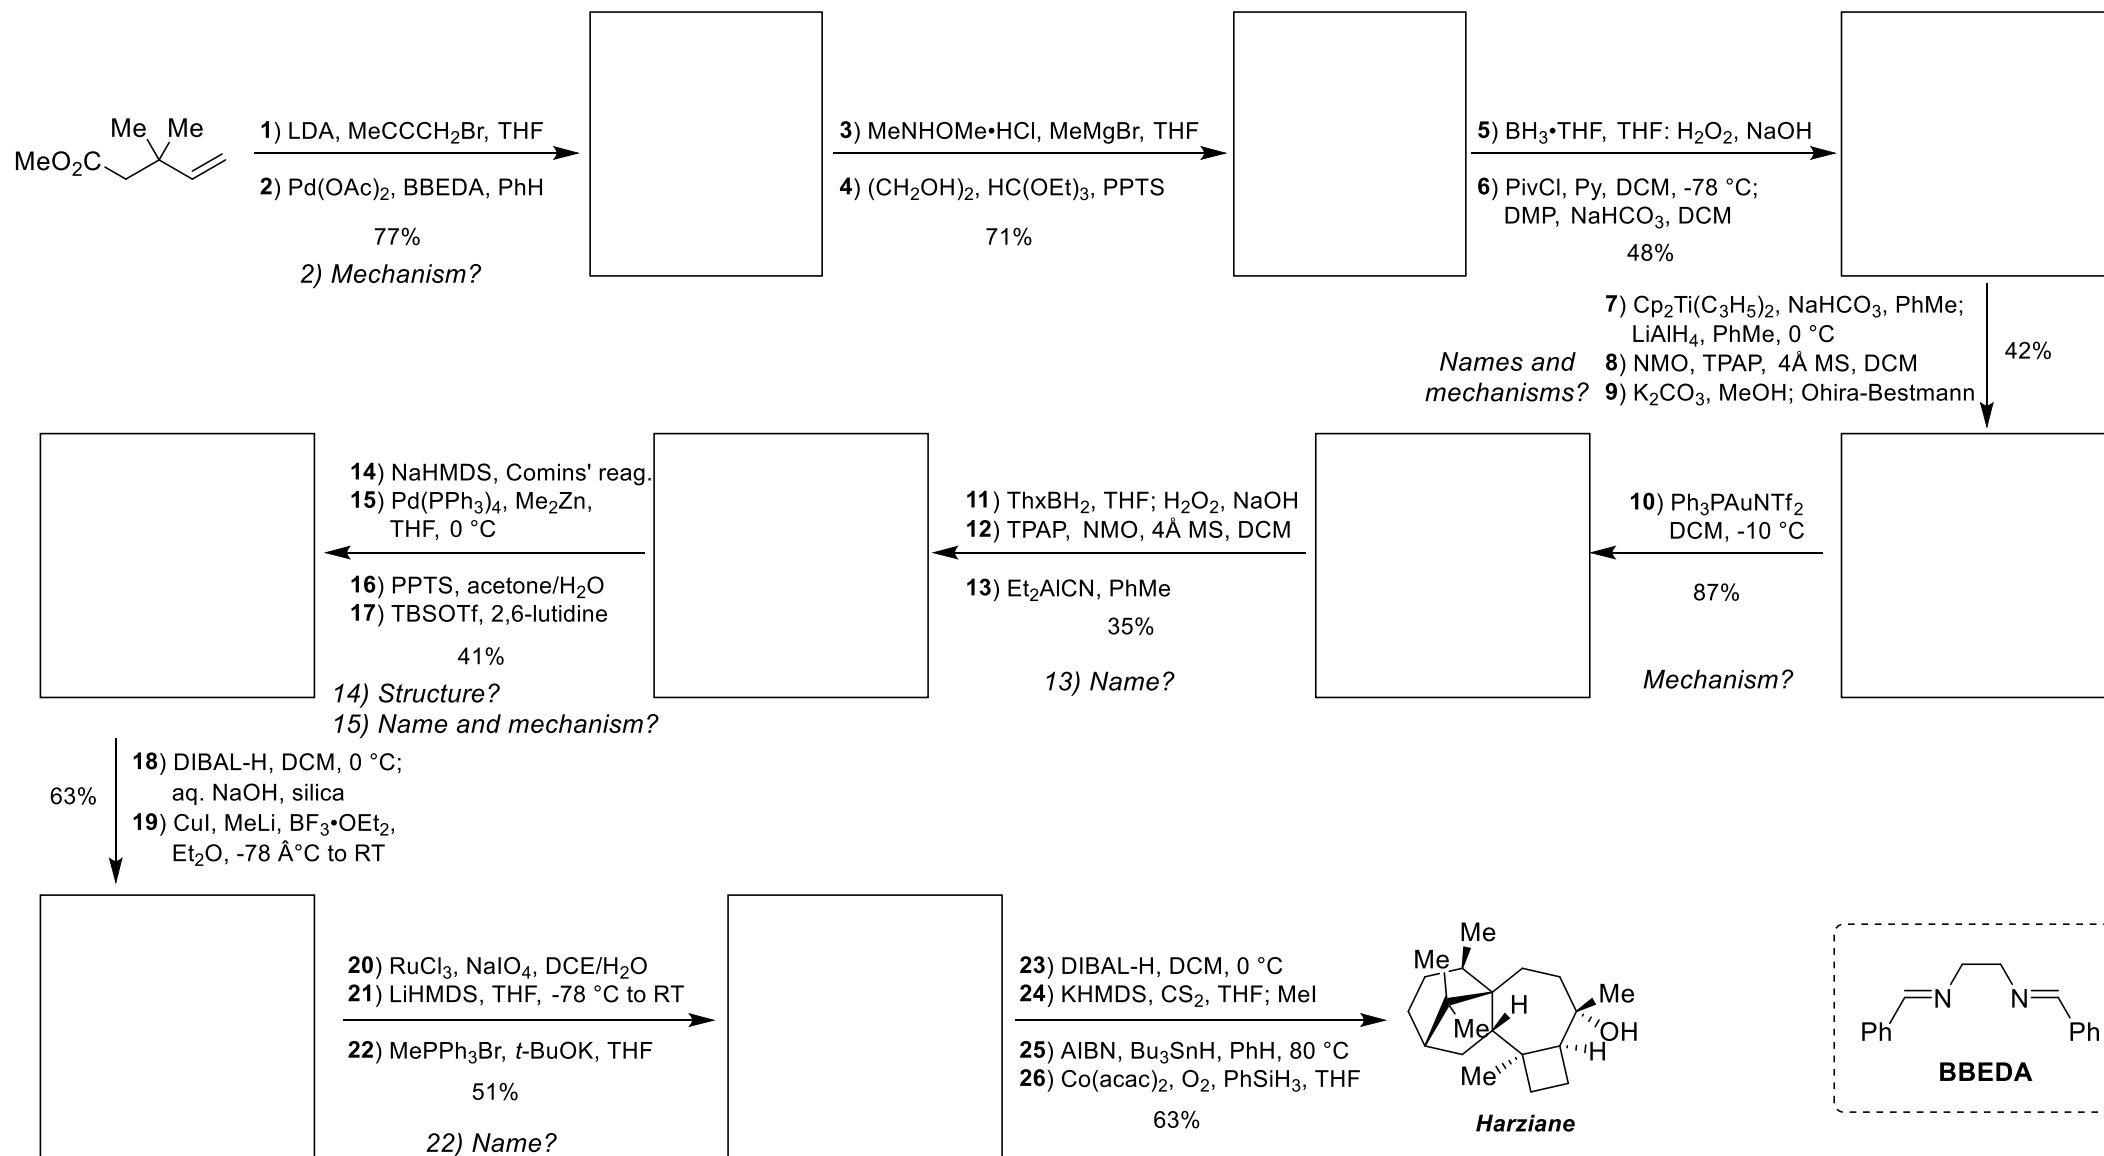

24-26) Names and mechanisms?

# Total Synthesis of Atlanticone C

A. Zech, C. Jandl and T. Bach, *Angew. Chem., Int. Ed.*, 2019, **58**, 14629-14632.

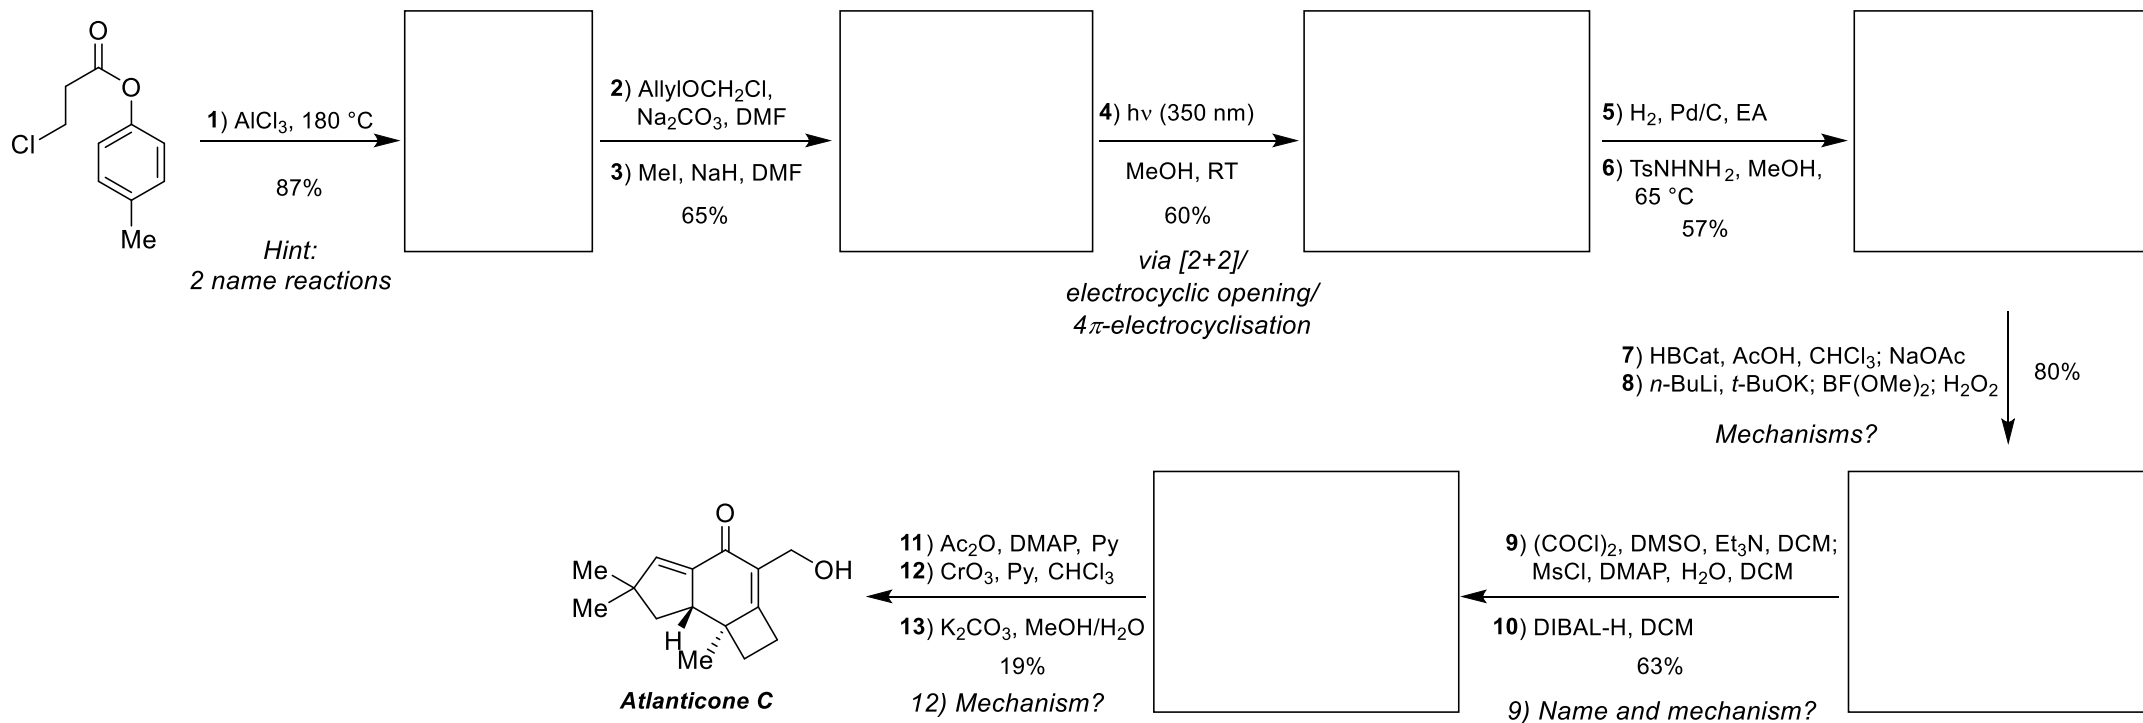



# Total Synthesis of (+)-Plumisclerin A

M. Gao, Y.-C. Wang, K.-R. Yang, W. He, X.-L. Yang and Z.-J. Yao, *Angew. Chem., Int. Ed.*, 2018, **57**, 13313-13318.

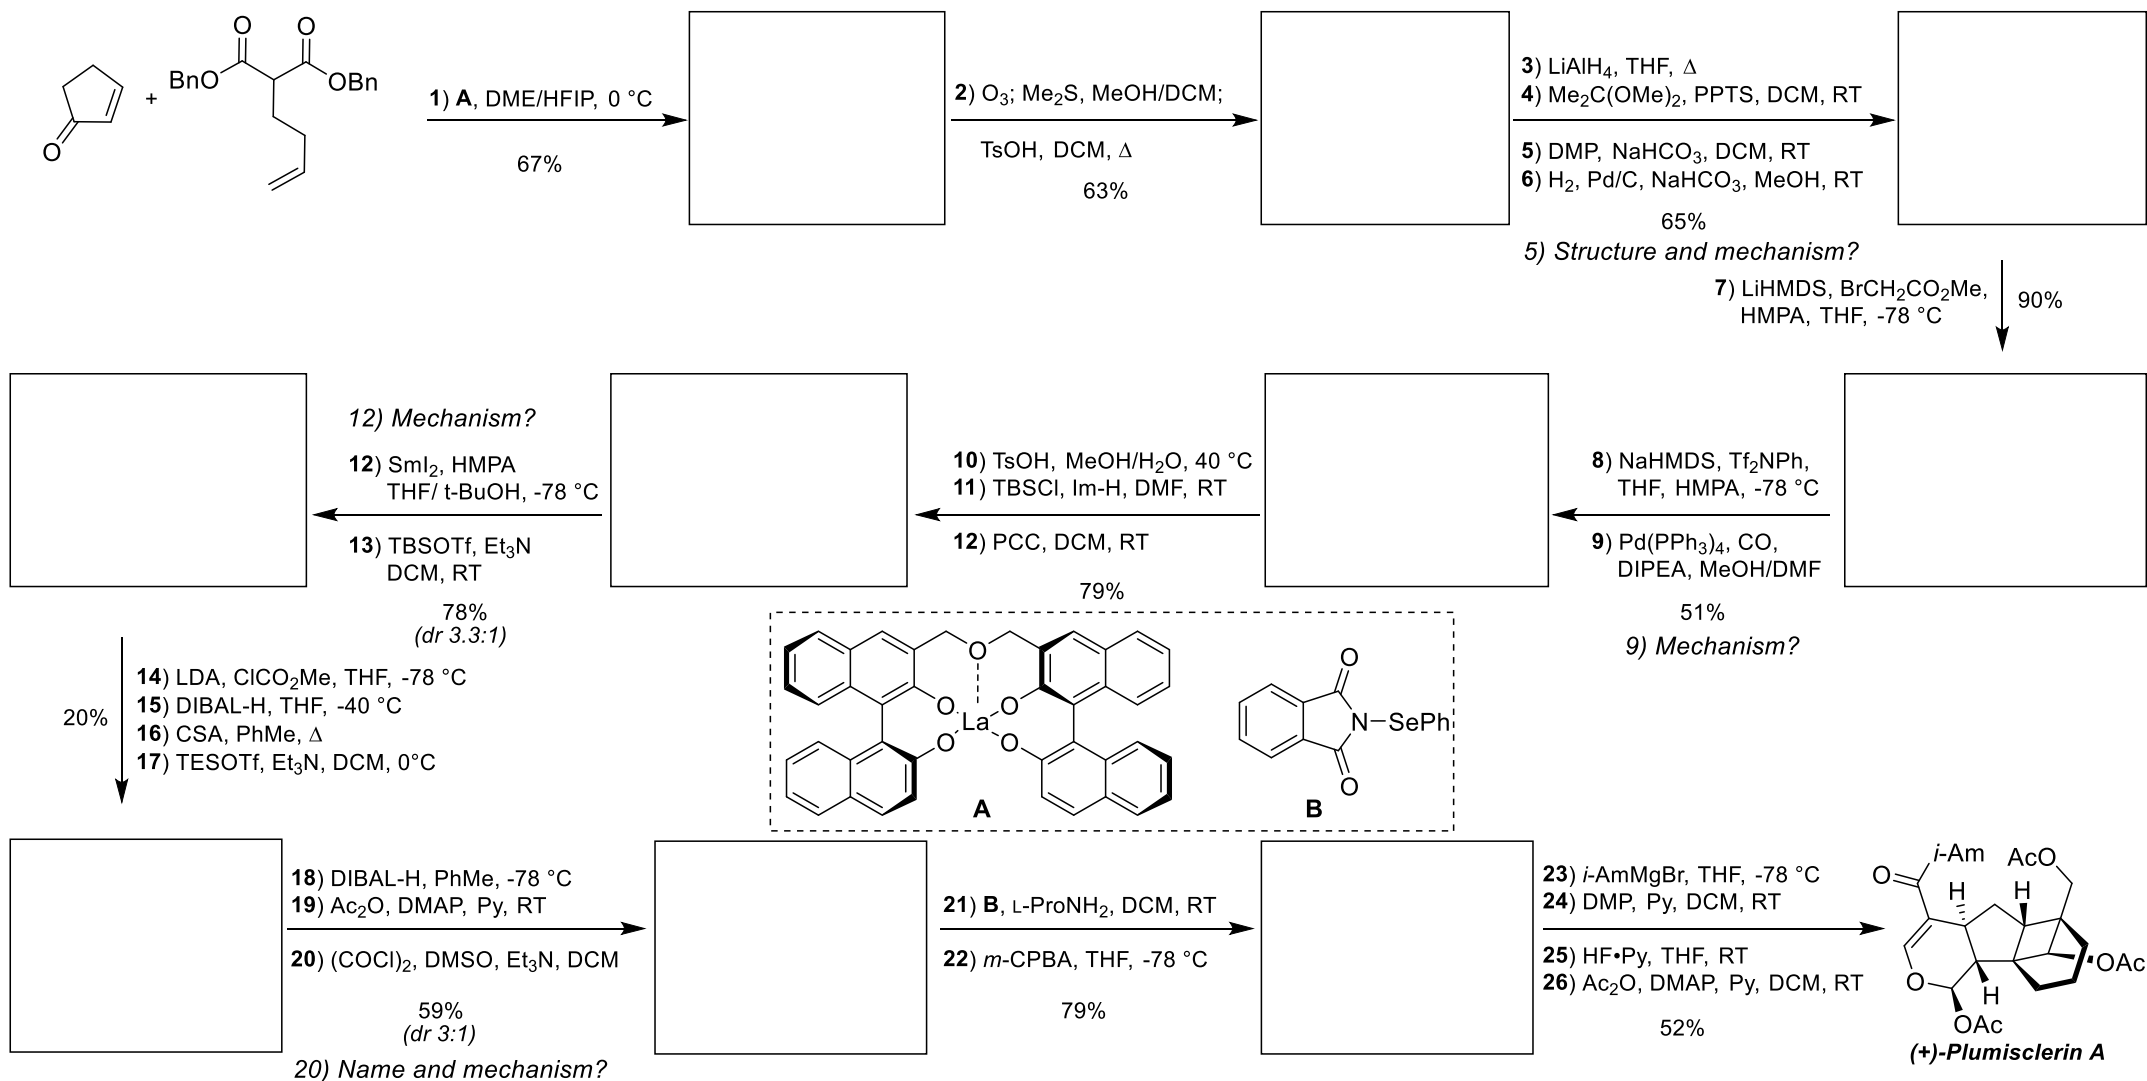

# Total Synthesis of (+)-Dendrowardol C

H. Wolleb and E. M. Carreira, *Angew. Chem., Int. Ed.*, 2017, **56**, 10890-10893.

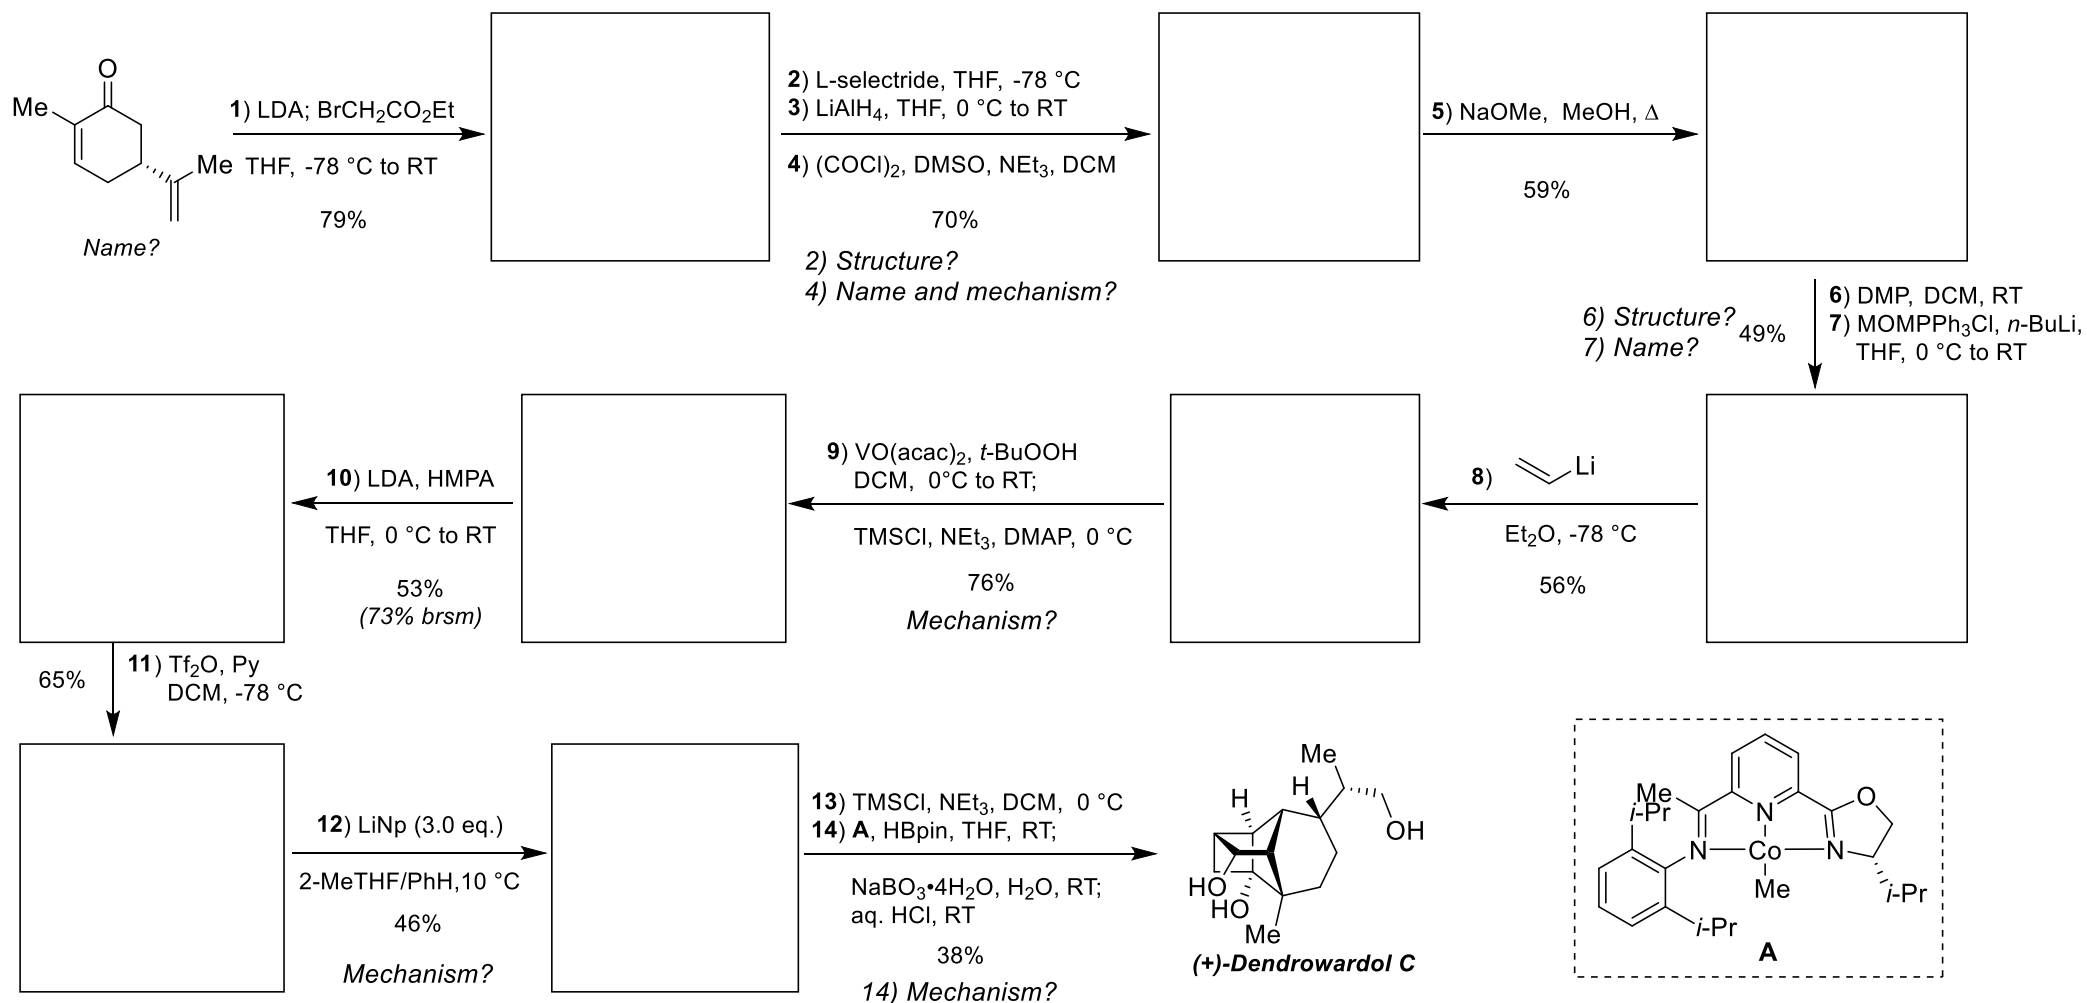

# Total Synthesis of (+)-Aplydactone

A. J. Burckle, V. H. Vasilev and N. Z. Burns, *Angew. Chem., Int. Ed.*, 2016, **55**, 11476-11479.

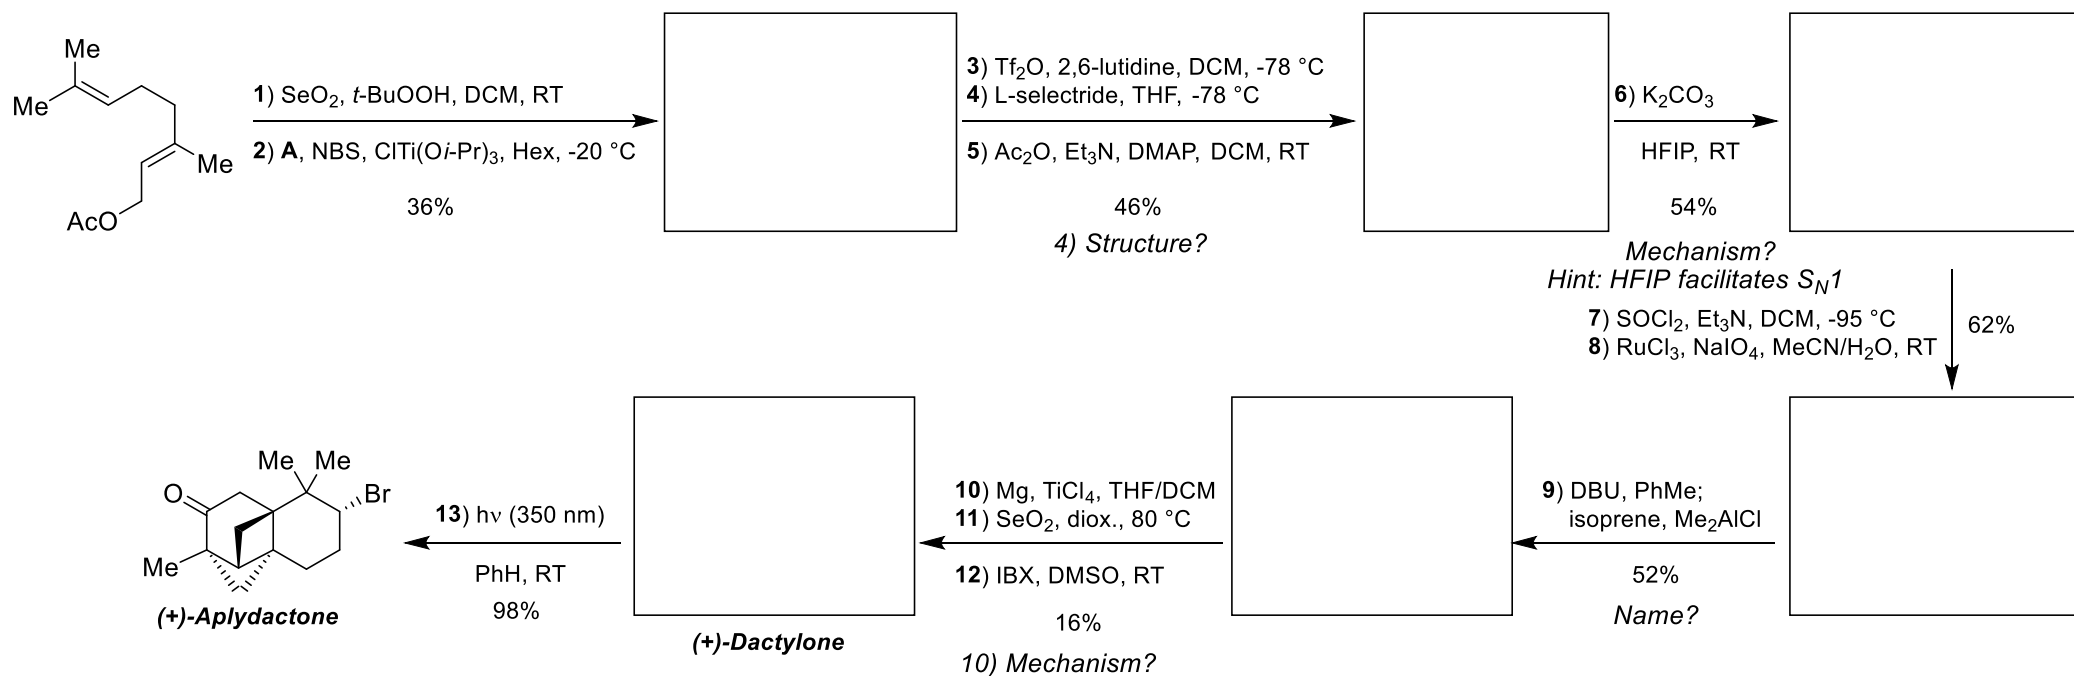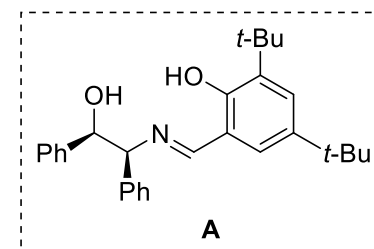

# Total Synthesis of Aplydactone

R. Meier and D. Trauner, *Angew. Chem., Int. Ed.*, 2016, **55**, 11251-11255.

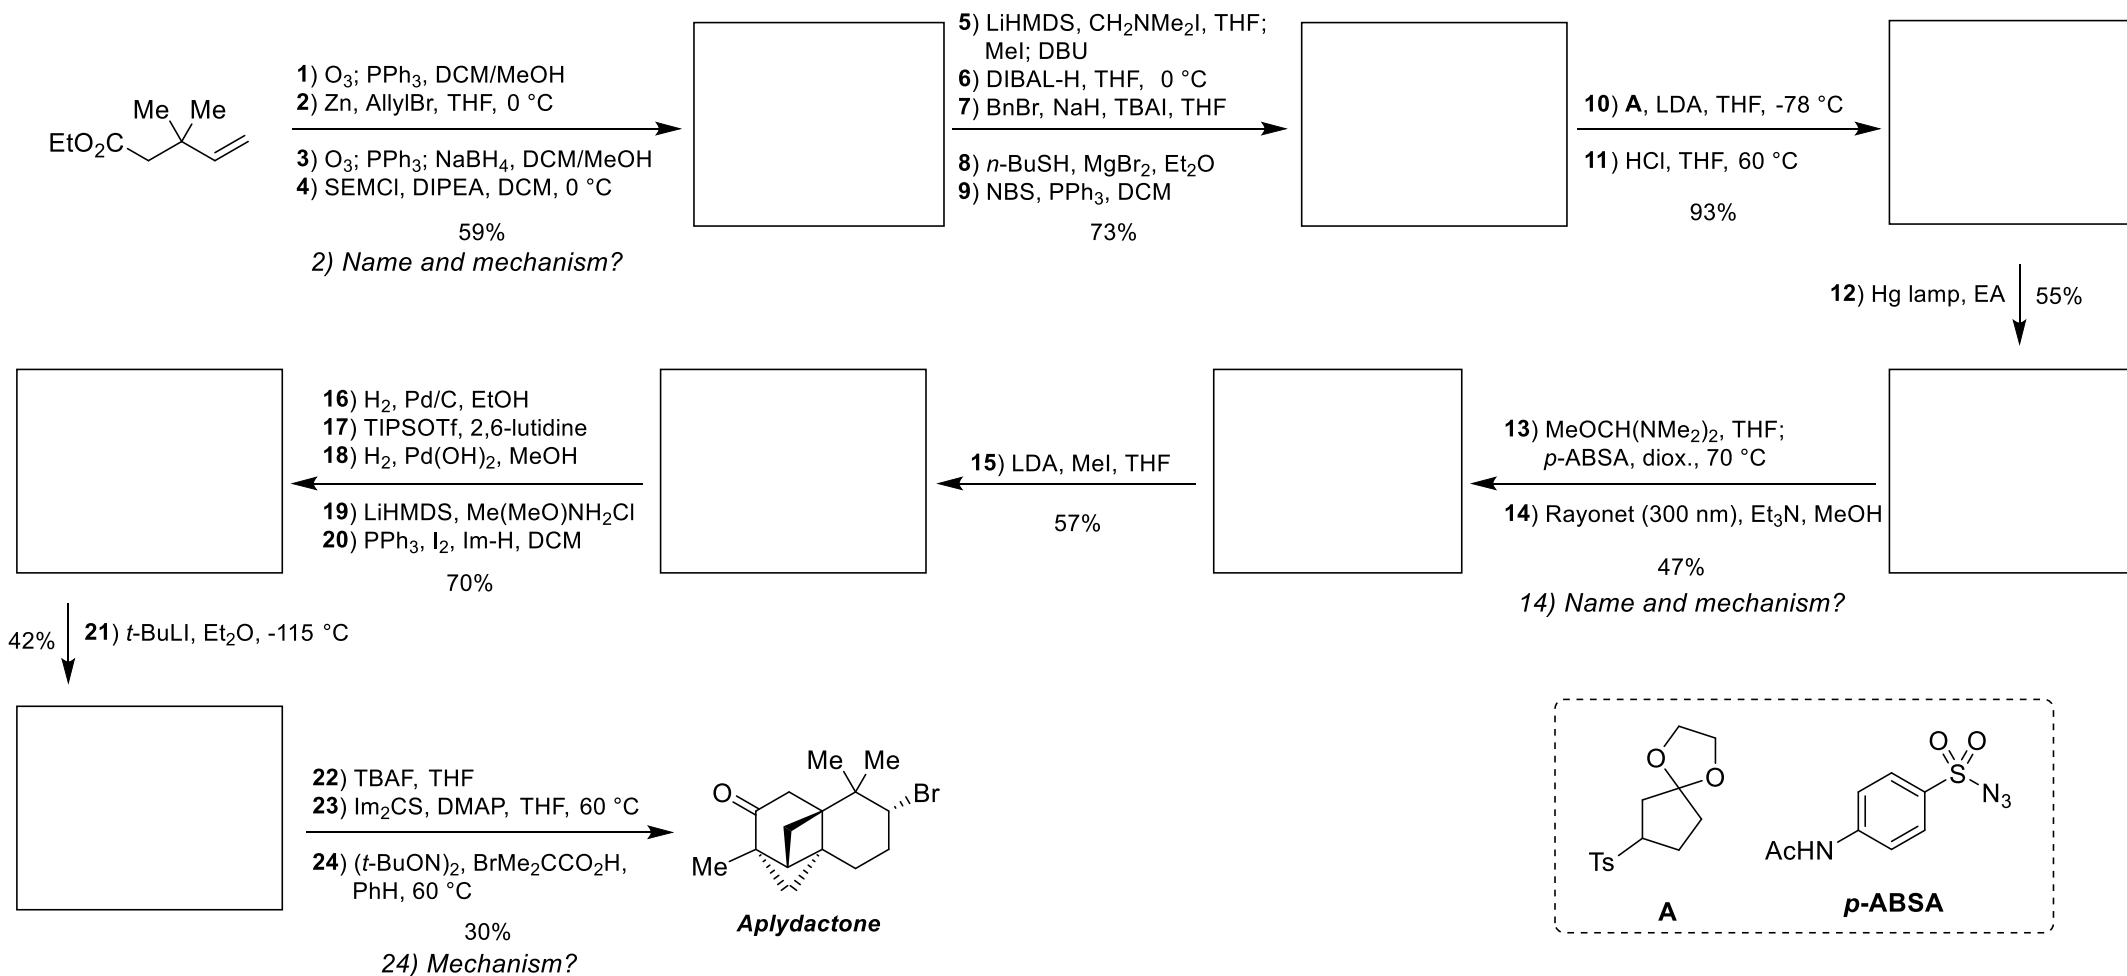

# Total Synthesis of Aplydactone

C. Liu, R. Chen, Y. Shen, Z. Liang, Y. Hua and Y. Zhang, *Angew. Chem., Int. Ed.*, 2017, **56**, 8187-8190.

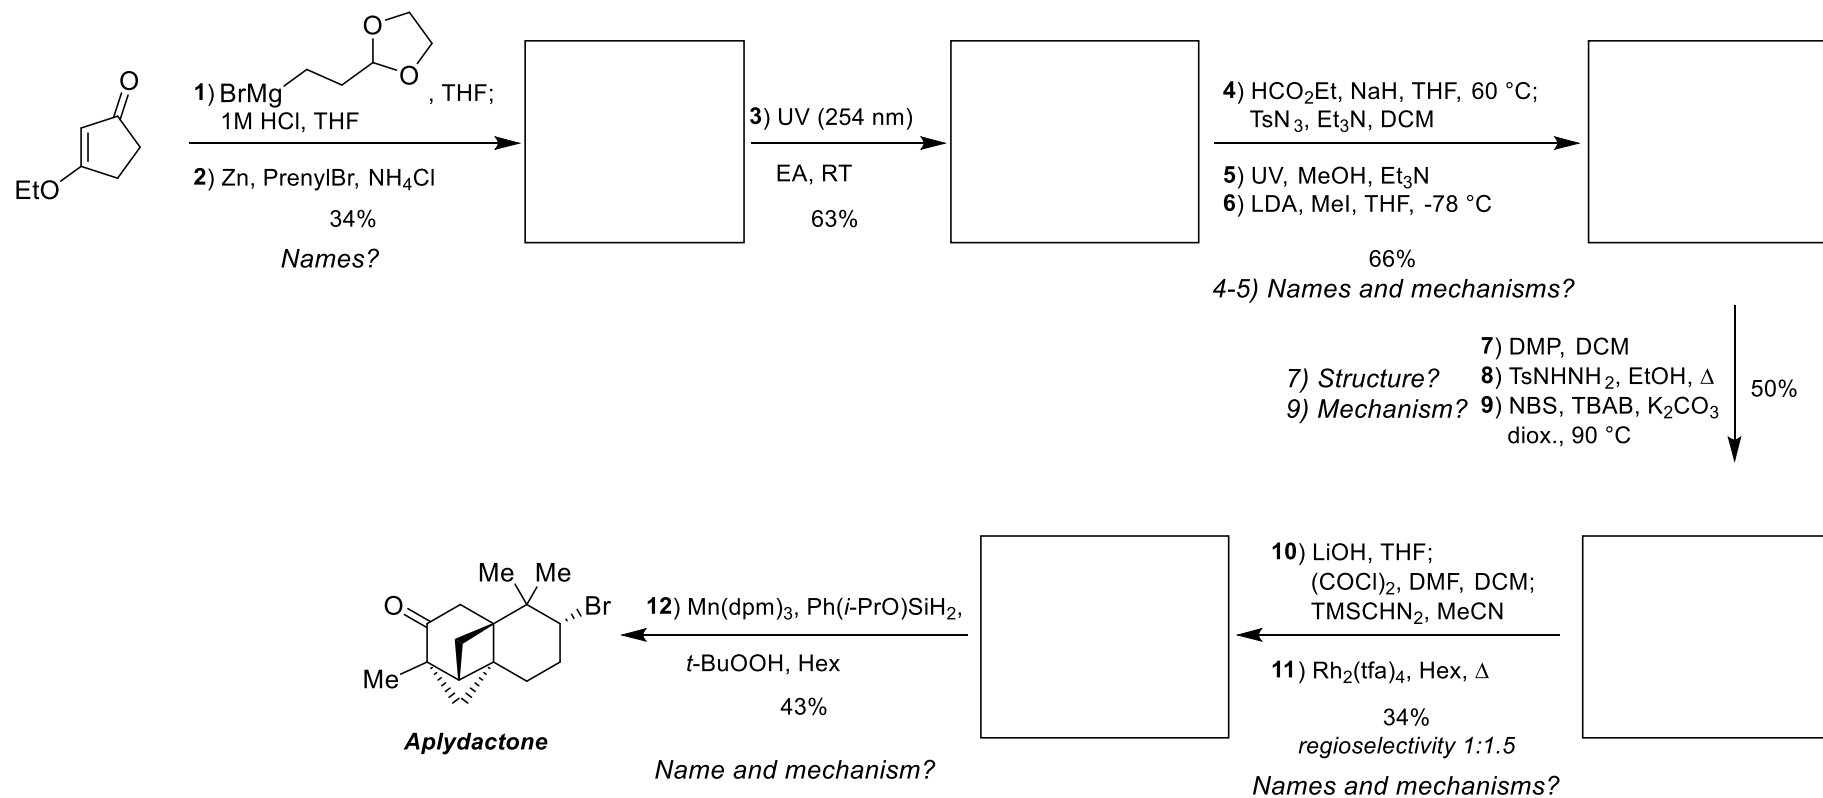

Supplement: d2cc00926a1.pdf [file d2cc00926a1.pdf]
